# Supplementary material for: An Explanatory Model of Vascular Access Care Quality: Results of a Cross-Sectional Observational Study
Source: MDPI journal article supplement (doi:10.3390/nursrep14020079), 2024-04-26
Supplement: s1 [file s1]

**Table S1.** Descriptive variables from the INCATIV Questionnaire.

|                                            | N    | %     |
|--------------------------------------------|------|-------|
| <b>HOSPITALS</b>                           |      |       |
| H1                                         | 361  | 22,91 |
| H2                                         | 113  | 7,17  |
| H3                                         | 439  | 27,86 |
| H4                                         | 315  | 19,99 |
| H5                                         | 348  | 22,08 |
| <b>TYPE OF VAD</b>                         |      |       |
| PIVC (Peripheral IV catheter)              | 1410 | 89,5  |
| CVC (Central IV Catheter)                  | 91   | 5,8   |
| PICC                                       | 44   | 2,8   |
| Arterial Line                              | 23   | 1,5   |
| RSV (Reservoir, centra line)               | 8    | ,5    |
| <b>VA PRESCRIPTION</b>                     |      |       |
| Fluid therapy                              | 695  | 44,1  |
| Medicación                                 | 531  | 33,7  |
| Parenteral nutrition                       | 26   | 1,6   |
| None (possible non used line)              | 324  | 20,6  |
| <b>VA USE</b>                              |      |       |
| Continuous                                 | 700  | 44,4  |
| Intermittent                               | 816  | 51,8  |
| In Y                                       | 60   | 3,8   |
| <b>INFUSION TYPE</b>                       |      |       |
| Gravity infusion                           | 934  | 59,3  |
| Pump                                       | 190  | 12,1  |
| Infuser                                    | 19   | 1,2   |
| Does not carry (intermittent line)         | 433  | 27,5  |
| <b>IV SYSTEM TYPE</b>                      |      |       |
| Closed                                     | 1257 | 79,8  |
| Open                                       | 319  | 20,2  |
| <b>ANATOMICAL LOCATION</b>                 |      |       |
| Forearm                                    | 525  | 33,3  |
| Back of hand                               | 405  | 25,7  |
| Wrist                                      | 224  | 14,2  |
| Arm flexure                                | 319  | 20,2  |
| Upper third of the arm                     | 14   | ,9    |
| Subclavian                                 | 42   | 2,7   |
| Jugular                                    | 38   | 2,4   |
| Reservoir                                  | 9    | ,6    |
| <b>CANNULA SIZE PIVC</b>                   |      |       |
| 18G                                        | 239  | 16,95 |
| 20G                                        | 661  | 46,88 |
| 22G                                        | 204  | 14,47 |
| Others                                     | 306  | 21,70 |
| <b>CANNULA SIZE CVC</b>                    |      |       |
| 4Fr                                        | 21   | 7,32  |
| 5Fr                                        | 47   | 16,38 |
| 6Fr                                        | 5    | 1,74  |
| 7Fr                                        | 122  | 42,51 |
| 8Fr                                        | 16   | 5,57  |
| Others                                     | 76   | 26,48 |
| <b>NUMBER OF LUMENS</b>                    |      |       |
| One lumen                                  | 1453 | 92,2  |
| Two lumens                                 | 47   | 3,0   |
| Three lumens                               | 76   | 4,8   |
| <b>DRESSING TYPE</b>                       |      |       |
| Transparent dressing                       | 1226 | 77,8  |
| Opaque dressing                            | 119  | 7,6   |
| Clumps ("Mazacote" inappropriate)          | 109  | 6,9   |
| Transparent dressing padded edges          | 122  | 7,7   |
| <b>DRESSING DATE RECORDED</b>              |      |       |
| Yes                                        | 1016 | 64,5  |
| No                                         | 560  | 35,5  |
| <b>LAST DRESSING CHANGE</b>                |      |       |
| 0-3 days                                   | 1345 | 85,3  |
| 4-7 days                                   | 209  | 13,3  |
| 8, 9 o more days                           | 22   | 1,4   |
| <b>INSERTION POINT VISIBILITY</b>          |      |       |
| Yes                                        | 1286 | 81,6  |
| No                                         | 290  | 18,4  |
| <b>POST-CATHETER ACCESS</b>                |      |       |
| Bioconnector/safety shutter                | 64   | 4,1   |
| Perforating membrane shutter               | 9    | ,6    |
| 3-way connector without extension          | 124  | 7,9   |
| 3-way without extension with bioconnect    | 82   | 5,2   |
| Extension WITH 3-ay connector              | 365  | 23,2  |
| Extension WITH 3-way WITH bioconnector     | 754  | 47,8  |
| Bifurcated/trifurcated extension           | 51   | 3,2   |
| Bifurcated/trifurcated extension with bio  | 127  | 8,1   |
| <b>THREE-WAY CONNECTOR</b>                 |      |       |
| One                                        | 1266 | 80,3  |
| None                                       | 207  | 13,1  |
| More than one                              | 103  | 6,5   |
| <b>LINE CONDITION (multiple selection)</b> |      |       |
| Uncovered access                           | 52   | 3,3   |
| All accesses in use, connected             | 245  | 15,5  |
| Connector cap                              | 373  | 23,7  |
| Perforating membrane shutter               | 55   | 3,5   |
| Bioconnector                               | 1067 | 67,7  |
| Does not have line (Reservoir)             | 27   | 1,7   |
| <b>PHLEBITIS PRESENCE</b>                  |      |       |
| No                                         | 1458 | 92,5  |
| Yes                                        | 118  | 7,5   |
